# Supplementary material for: Multisite prospective Liver Disease and Reproductive Ageing (LIVRA) study in US women living with and without HIV
Source: HighWire-hosted journal article supplement (doi:10.1136/bmjopen-2021-055706), 2022-04-01
Supplement: bmjopen-2021-055706supp001_data_supplement.pdf [file bmjopen-2021-055706supp001_data_supplement.pdf]

**Supplemental Table 1. Factors associated with CAP in multivariable analysis\*, excluding VCTE scans with abnormal validity criteria.**

|                                            | Excluding if IQR/Med >30%<br>(N=1520) |        | Excluding success rate <60%<br>(N=1447) |        | Excluding poor image quality<br>(N=1527) |        | Excluding any abnormal<br>validity criteria (N=1383) |        |
|--------------------------------------------|---------------------------------------|--------|-----------------------------------------|--------|------------------------------------------|--------|------------------------------------------------------|--------|
|                                            | CAP difference (dB/m) p-value         |        | CAP difference (dB/m) p-value           |        | CAP difference (dB/m) p-value            |        | CAP difference (dB/m) p-value                        |        |
| Infection Status<br>(ref=HIV-/HCV-)        |                                       |        |                                         |        |                                          |        |                                                      |        |
| HIV+/HCV-                                  | 0.3 (-6.2, 6.8)                       | 0.92   | -1.1 (-7.7, 5.5)                        | 0.74   | 1.4 (-4.8, 7.6)                          | 0.65   | -0.2 (-6.7, 6.3)                                     | 0.95   |
| HIV-/HCV+                                  | -11.7 (-25.3, 2)                      | 0.09   | -16.6 (-30.5, -2.7)                     | 0.02   | -11.2 (-24, 1.7)                         | 0.09   | -17.8 (-31.5, -4.1)                                  | 0.01   |
| HIV+/HCV+                                  | -8.4 (-17.5, 0.7)                     | 0.07   | -12.1 (-21.2, -3)                       | 0.01   | -8.5 (-17.2, 0.2)                        | 0.06   | -9.5 (-18.5, -0.5)                                   | 0.04   |
| Age (per 10 years)                         | 2.4 (-2.2, 6.9)                       | 0.31   | 1.6 (-3, 6.2)                           | 0.50   | 1.3 (-3.1, 5.6)                          | 0.56   | 0.9 (-3.7, 5.5)                                      | 0.70   |
| Race/Ethnicity<br>(ref=white non-Hispanic) |                                       |        |                                         |        |                                          |        |                                                      |        |
| Black                                      | -5.6 (-13.9, 2.7)                     | 0.18   | -8.2 (-16.5, 0)                         | 0.05   | -5.7 (-13.5, 2.2)                        | 0.16   | -7.3 (-15.5, 0.9)                                    | 0.08   |
| Hispanic                                   | -4.2 (-13.8, 5.4)                     | 0.40   | -4.4 (-13.9, 5)                         | 0.36   | -3.6 (-12.7, 5.6)                        | 0.45   | -4.9 (-14.2, 4.5)                                    | 0.31   |
| Other                                      | 4.4 (-6.8, 15.6)                      | 0.44   | 3.6 (-7.5, 14.7)                        | 0.53   | 2.9 (-7.8, 13.5)                         | 0.60   | 4.6 (-6.3, 15.6)                                     | 0.40   |
| WC (per 10 cm)                             | 17.8 (16.2, 19.5)                     | <0.001 | 17.5 (15.9, 19.2)                       | <0.001 | 17.8 (16.3, 19.4)                        | <0.001 | 17.6 (15.9, 19.2)                                    | <0.001 |
| HOMA-IR (per doubling)                     | 1.2 (0.8, 1.6)                        | <0.001 | 1.5 (1, 2)                              | <0.001 | 1.2 (0.8, 1.5)                           | <0.001 | 1.5 (1, 2)                                           | <0.001 |

\*Also adjusted for alcohol use, smoking status, and menopause stage

**Supplemental Table 2. Factors associated with liver stiffness in multivariable analysis, excluding VCTE scans with abnormal validity criteria.**

|                                            | Excluding if IQR/Med >30%<br>(N=1520) |         | Excluding success rate <60%<br>(N=1447) |         | Excluding poor image quality<br>(N=1527) |         | Excluding any abnormal<br>validity criteria (N=1383) |         |
|--------------------------------------------|---------------------------------------|---------|-----------------------------------------|---------|------------------------------------------|---------|------------------------------------------------------|---------|
|                                            | LS % change                           | p-value | LS % change                             | p-value | LS % change                              | p-value | LS % change                                          | p-value |
| Infection Status<br>(ref=HIV-/HCV-)        |                                       |         |                                         |         |                                          |         |                                                      |         |
| HIV+/HCV-                                  | 4.4% (-1.2%, 10.3%)                   | 0.12    | 4.5% (-1.2%, 10.5%)                     | 0.12    | 4.1% (-1.4%, 9.9%)                       | 0.14    | 5.2% (-0.6%, 11.3%)                                  | 0.08    |
| HIV-/HCV+                                  | 44.2% (28.6%, 61.6%)                  | <0.001  | 45.1% (29%, 63.1%)                      | <0.001  | 44.5% (29.3%, 61.5%)                     | <0.001  | 46.8% (30.5%, 65.2%)                                 | <0.001  |
| HIV+/HCV+                                  | 34.4% (24.3%, 45.2%)                  | <0.001  | 35.2% (25%, 46.2%)                      | <0.001  | 31.1% (21.5%, 41.6%)                     | <0.001  | 33.6% (23.4%, 44.6%)                                 | <0.001  |
| Age (per 10 years)                         | 4.6% (0.6%, 8.7%)                     | 0.02    | 3.4% (-0.6%, 7.5%)                      | 0.10    | 3.3% (-0.6%, 7.3%)                       | 0.10    | 3.1% (-0.9%, 7.3%)                                   | 0.13    |
| Race/Ethnicity<br>(ref=white non-Hispanic) |                                       |         |                                         |         |                                          |         |                                                      |         |
| Black                                      | 2.2% (-4.7%, 9.6%)                    | 0.54    | 2.3% (-4.6%, 9.7%)                      | 0.52    | 1% (-5.7%, 8.1%)                         | 0.78    | 0.2% (-6.6%, 7.6%)                                   | 0.95    |
| Hispanic                                   | 3.7% (-4.5%, 12.4%)                   | 0.39    | 2.2% (-5.8%, 10.8%)                     | 0.60    | 1% (-6.8%, 9.4%)                         | 0.82    | 0.5% (-7.4%, 9.1%)                                   | 0.90    |
| Other                                      | 1.9% (-7.4%, 12%)                     | 0.70    | 2.8% (-6.5%, 13%)                       | 0.57    | 1.3% (-7.7%, 11.2%)                      | 0.79    | 1.5% (-7.7%, 11.6%)                                  | 0.76    |
| WC (per 10 cm)                             | 4.4% (2.7%, 6.1%)                     | <0.001  | 3.8% (2.1%, 5.5%)                       | <0.001  | 4.4% (2.7%, 6.1%)                        | <0.001  | 3.4% (1.7%, 5.2%)                                    | <0.001  |
| log2HOMA-IR                                | 0.3% (0%, 0.7%)                       | 0.08    | 0.1% (-0.4%, 0.5%)                      | 0.80    | 0.3% (-0.1%, 0.6%)                       | 0.14    | 0.1% (-0.4%, 0.5%)                                   | 0.79    |
| CAP (per 10 dB/m)                          | 0.6% (0.1%, 1%)                       | 0.01    | 0.7% (0.2%, 1.2%)                       | 0.004   | 0.6% (0.1%, 1.1%)                        | 0.01    | 0.7% (0.2%, 1.2%)                                    | 0.01    |

\*Also adjusted for alcohol use, smoking status, and menopause stage
